# Supplementary material
Source: Springer Nature journal article supplement (https://www.springermedizin.de/resource/supplementary/13256_2012_2413_MOESM1_ESM.pdf/9650308)

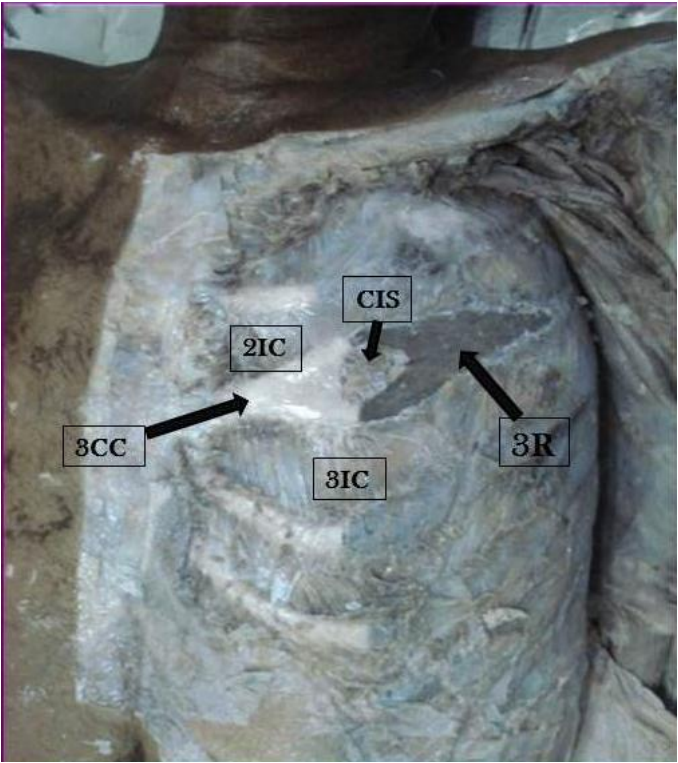

Supplement: MOESM1 [file 9650308]
